# Supplementary material for: A novel azulene synthesis from the Ramirez ylide involving two different modes of its reaction with activated alkynes
Source: Royal Society of Chemistry journal article supplement (doi:10.1039/b316759c), 2004-01-01
Supplement: b316759c.doc [file b316759c.doc]

**Electronic Supplementary Information**

***Experimental.***

Routine 1H and 13C NMR spectra were obtained on a Jeol JNMGX 270 MHz spectrometer in CDCl3 at 25 ˚C with TMS as internal standard unless otherwise stated. The 31P NMR spectra were recorded under the same conditions on a Varian Unity 300 MHz instrument with 85 % orthophosphoric acid as external standard. UV/Visible spectra were obtained in 1 cm quartz cells on a Hewlett Packard spectrophotometer. IR spectra (KBr) were recorded on a Mattson Instruments spectrophotometer. Elemental analyses and mass spectra were carried out at UCD.

The reactions were carried out under a N2 atmosphere dried by passing it through anhydrous calcium chloride. All commercially available chemicals were used without further purification unless specified. The liquid acetylene dicarboxylates (Aldrich) were stored under N2 and refrigerated. Cyclopentadiene was prepared [[1]](#endnote-2) from technical dicyclopentadiene and used immediately. Solvents were dried according to standard procedures. [[2]](#endnote-3)

*Cyclopentadien-1-ylidenetriphenylphosphorane* ***1****.*

This was a modification of the Ramirez route. [[3]](#endnote-4) Freshly distilled cyclopentadiene (20.0 cm3, 16.5 g, 0.25 mol.) was dissolved in chloroform and cooled to – 65 °C. Bromine was added slowly to this (12.5 cm3, 39.8 g, 0.25 mol) and the temperature kept constant. After 1 h the reaction was allowed to warm to room temperature and was added to a solution of triphenylphosphine (131.1 g, 0.5 mol.) in chloroform (500 cm3). After reflux (14 h) the solvent was evaporated to leave a glassy yellow residue, which was redissolved in methanol (1 L). The solution was cooled to 0 °C and 10 % NaOH was added until the pH was 11. The yellow precipitate generated was filtered and washed with cold water and methanol. In air and light the product becomes discoloured but can be recrystallised from dichloromethane/ethanol to give a light brown solid. This was redissolved in dichloromethane (150 cm3) and heated, and decolourising charcoal added (10 g). After 5 minutes, hot filtration and evaporation yielded a yellow solid, which does not degrade in air or light.

Yield 43.3 g, (53 %). Mpt. = 228 - 229 °C (Lit. value 225 – 227 °C).

*v*max (KBr): 3080, 1485, 1440, 1435, 1355, 1315, 1230, 1220, 1205, 1185, 1160, 1110, 1105, 1050, 1035, 1000, 760, 730 cm -1.

1H NMR: 7.45-7.97 (m, 15 H, aryl), 6.44-6.49 (m, 2 H, cyclopentadienyl), 6.27-6.31 (m, 2H, cyclopentadienyl) ppm.

*Z-2-(,-Dicarbomethoxyvinyl)cyclopentadien-1-ylidenetriphenylphosphorane Z-****2****.*

*This preparation is optimised to yield a higher proportion of* ***Z****-2 from the E/Z mix.*

Dimethylacetylene dicarboxylate (0.43 g, 3.0 mmol) was added to a foil-enclosed solution of **1** (1.0 g, 3.0 mmol) in benzene and stirred overnight. The yellow precipitate was filtered and stored and the filtrate was evaporated to give a solid, which when triturated with hot methanol gave a fine yellow powder. Both solids were identical by 1H NMR and were combined. Yield = 0.86 g, (60 %). Mpt. = 244 – 245 °C. 1H NMR (Varian Unity 300 MHz): 7.71-7.51 (m, 15 H, aryl), 6.74 (m, 1H, cyclopentadienyl), 6.28 (m, 1H, cyclopentadienyl), 5.96, (m, 1H, cyclopentadienyl), 4.71 (s, 1H, vinyl), 3.90 (s, 3H, methyl), 3.34 (s, 3H, methyl) ppm. 13C NMR: 171.0, 167.0, 134.2, 133.7, 133.1, 133.0, 131.0, 129.4, 128.8, 126.5, 126.0, 122.0, 121.7, 120.6, 115.1, 114.5, 114.1, 104.1, 83.5, 51.4, 50.3 ppm. 31P NMR: 14.8 ppm. Anal. Calcd. (found) for C29H25O4P: C, 74.35 (74.08); H, 5.38 (5.70). Mass spectrum: m/z 468 (M+). *v*max (KBr): 3075, 2895, 2920 (sh.), 1730 (C=O), 1680-1695 (C=O), 1550-70, 1470, 1440, 1390 (w), 1370, 1350, 1315, 1270, 1220, 1180, 1145, 1105 cm -1. λmax (logε, CH2Cl2): 348 (sh.) (4.37), 395 (4.40), 5.46 (sh.) (1.07) nm.

*E-2-(,-Dicarbomethoxyvinyl)cyclopentadien-1-ylidenetriphenylphosphorane E-****2****.*

The phosphorane *Z*-**2** (1.0 g, 2.14 mmol) was dissolved in dichloromethane (40 cm3) in a 50 cm3 Pyrex round bottomed flask, and sealed under nitrogen with parafilm. The flask was placed 15 cm from the UV source (300 W commercially available sunlamp) and irradiated for 96 h. The wine coloured solution was evaporated and the brown-orange solid was recrystallised with dichloromethane/ethanol in a darkened flask to give yellow crystals. Yield = 0.9 g, (90 %). Mpt. = 234 – 235 °C. 1H NMR (Varian Unity 300 MHz): 7.72-7.45 (m, 15 H, aryl), 6.29, (m, 4H, cyclopentadienyl/vinyl), 3.61 (s, 3H, methyl), 3.05 (s, 3H, methyl) ppm. 31P NMR: 12.7 ppm. Anal. Calcd. (Found) for C29H25O4P: C, 74.35 (74.30): H, 5.38 (5.34). Mass spectrum: m/z 468 (M+), 409 (M+ -CO2Me). *v*max (KBr): 2950, 2945, 2840, 1725, 1595, 1480, 1455, 1435, 1415, 1395, 1335, 1295, 1250, 1215, 1170, 1120, 1110, 1070, 1040, 1020 cm -1. λmax (logε, CH2Cl2): 260 (4.21), 407 (3.55) nm. In solution unprotected from the light **2b** reverts to a *Z:E* 60:40 % mixture after 1 week.

## Preparation of 1,5,6-tricarbomethoxy-3-methoxy-azulene **3**.

To a foil-enclosed solution of *E*-**2** (1.0 g, 2.14 mmol) in dichloromethane was added a solution of dimethylacetylene dicarboxylate (0.30 g, 0.26 cm3, 2.14 mmol) in the same solvent (10 cm3). The reaction was refluxed for 12 h, and then a further two equivalents of acetylene were added over the following 24 h. TLC (silica, diethyl ether) showed consumption of starting material. Flash chromatography (silica, dichloromethane) yielded a green compound, which was recrystallised from methanol to give dark red needle-like crystals of the azulene. Yield = 0.21 g, (30 %). Mpt. = 148 – 150 °C. 1H NMR: 9.33 (d, 3JHH = 9.9 Hz, 1 H), 8.99, (s, 1H), 7.95 (s, 1H), 7.30 (d, 3JHH = 9.9 Hz, 1 H), 4.08 (s, 3H, methoxy), 3.97 (s, 3H, carbomethoxy), 3.95 (s, 3H, carbomethoxy), 3.94 (s, 3H, carbomethoxy) ppm. 13C NMR: 139.49, 135.40, 124.05, 122.52, 124.05, 135.40, 139.49 ppm. Anal. Calcd. (found) for C17H16O7: C, 61.44 (61.54); H, 4.85 (5.16). *v*max (KBr): 2950, 2920, 2840, 1725, 1715, 1690, 1685, 1575, 1525, 1435, 1255, 1200 cm -1. λmax (logε, CH3OH): 661 (v. br, 293) 421.5 (4.07), 310 (4.59), 250 (4.34) nm.Mass spectrum: m/z 332 (M+), 317 (M+ - Me), 317 (M+ - OMe).

1. . Furnis, B. S.; Hannaford, A. J.; Rogers, V.; Smith, P. W. G.; Tatchell, A. R.; In Vogel’s *Textbook of Practical Organic Chemistry*, Longmann: London, 1978. [↑](#endnote-ref-2)
2. . Armerego, W.; Perrin, E.; *In Purification of Laboratory Chemicals*. Pergamon Press: 1988. [↑](#endnote-ref-3)
3. . Ramirez, F.; Levy, S.; *J. Am. Chem. Soc*., 1957, **79**, 6167. [↑](#endnote-ref-4)
